# Supplementary material
Source: publisher figshare collection journal article supplement (https://karger.figshare.com/ndownloader/files/11765192)
Supplement: Supplementary file 1 [file 11765192]

## Sheet: FENTON
	Values to be entered
	Gestational age (weeks)	Birth length Z-score according to Fenton curves	birth weight Z-score according to Fenton curves	discharge length Z-score according to Fenton curves	discharge weight Z-score according to Fenton curves	sex 1 for boys and 0 for girls
	Results of calculation
		NEONATAL WEIGHT GROWTH (Zscore)	EXPECTED LENGTH GROWTH (Zscore)	OBSERVED LENGTH GROWTH (Zscore)	∆OLG-ELG
		0	-5.5	0	5.5
